# Supplementary material
Source: Springer Nature journal article supplement (https://www.springermedizin.de/resource/supplementary/12968_2010_1456_MOESM1_ESM.pdf/9581044)

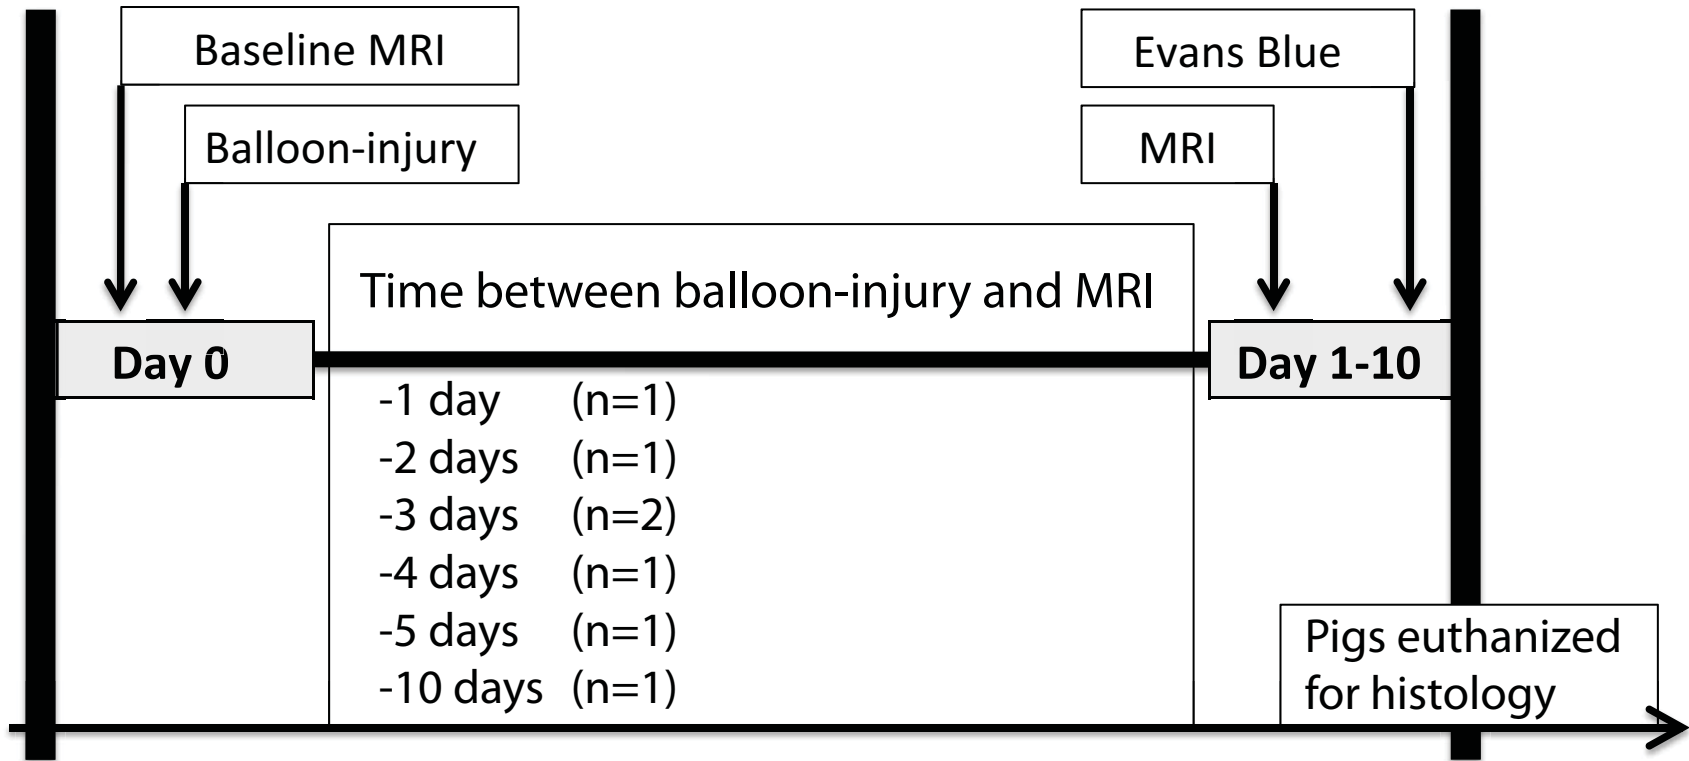

Supplement: MOESM1 [file 9581044]
